# Supplementary material
Source: Copernicus journal article supplement (doi:10.5194/egusphere-2026-1989)
Supplement: Supplementary file 1 [file egusphere-2026-1989-supplement.pdf]

*Hydrology and Earth System Sciences*

Supplementary Information for

**A reference basin based framework for identifying and transferring permafrost  
hydrological coupling regimes across China**

Lei Song<sup>1\*</sup>, Yanping Li<sup>2\*</sup>

<sup>1</sup> College of Hydrology and Water Resources, Hohai University, Nanjing, China

<sup>2</sup> College of Oceanography, Hohai University, Nanjing, China

**Contents of this file**

Figures S1-S4

### Sensitivity of DCD-C Trajectories to Maximum Response-Lag Window

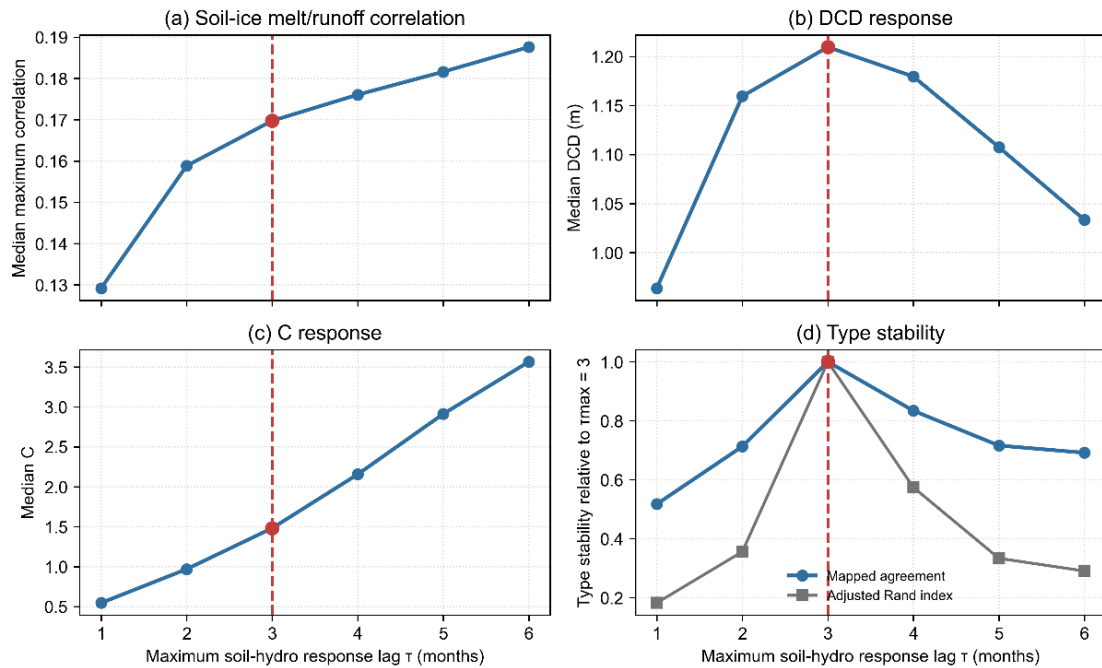

The red dashed line indicates the selected value  $r_{max} = 3$  months.

Figure S1. Sensitivity of DCD-C trajectories to the maximum response-lag window. The maximum response lag  $\tau$  defines the longest monthly lag considered when calculating the correlation between soil-ice melt and runoff response. (a) shows the median maximum soil-ice melt/runoff correlation under different  $\tau$  values. (b) shows the median DCD derived from the corresponding depth-wise coupling structure. (c) shows the median cumulative coupling strength C. (d) compares the regime assignments obtained under each  $\tau$  with those obtained under  $\tau = 3$  months, using mapped agreement and the adjusted Rand index. The red dashed line indicates the selected value  $\tau = 3$  months.

### Diagnostic Evaluation of the Number of DCD-C Trajectory Regimes

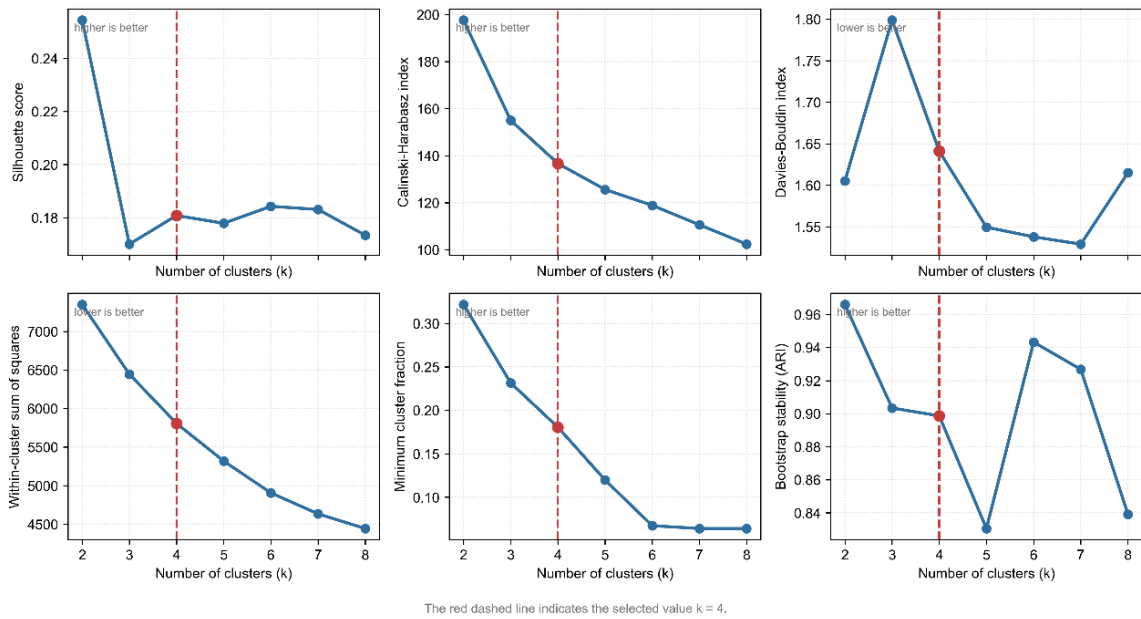

Figure S2. Diagnostic evaluation of candidate numbers of DCD-C trajectory regimes. Candidate cluster numbers from  $k = 2$  to  $k = 8$  were evaluated using multiple clustering diagnostics: (a) silhouette score, (b) Calinski-Harabasz index, (c) Davies-Bouldin index, (d) within-cluster sum of squares, (e) minimum cluster fraction, and (f) bootstrap stability. The red dashed line indicates the retained four-cluster solution. The diagnostics were used as complementary evidence together with cluster-size balance and physical interpretability, rather than as a single-metric optimization criterion.

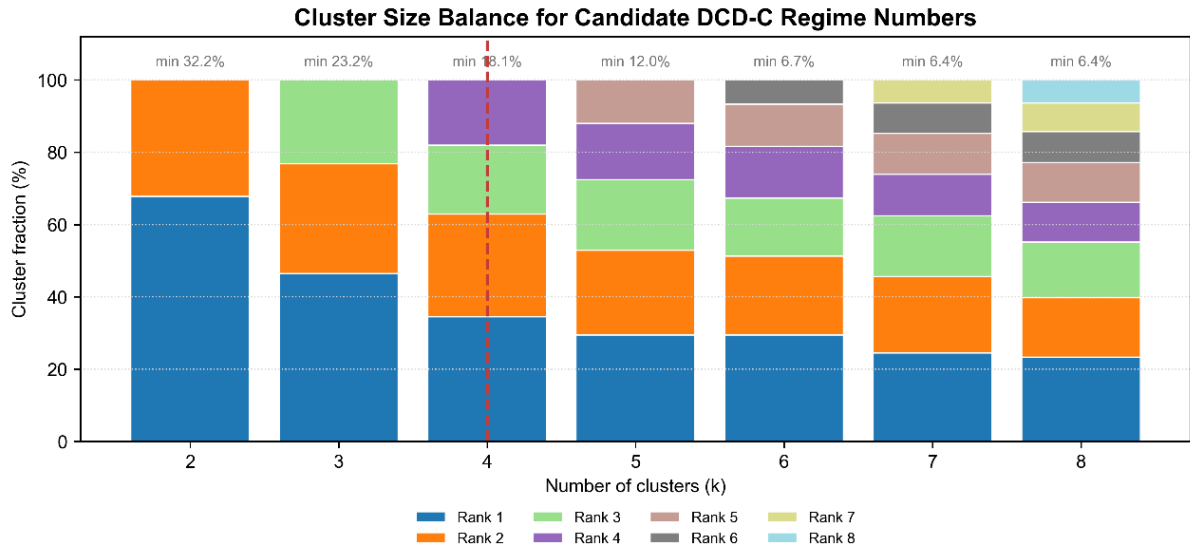

Figure S3. Cluster-size balance for candidate DCD-C regime numbers. The stacked bars show the relative fraction of samples assigned to each cluster under candidate values from  $k = 2$  to  $k = 8$ . The four-cluster solution retains relatively balanced regime sizes, whereas larger  $k$  values increasingly introduce smaller subgroups. The red dashed line indicates the retained four-cluster solution.

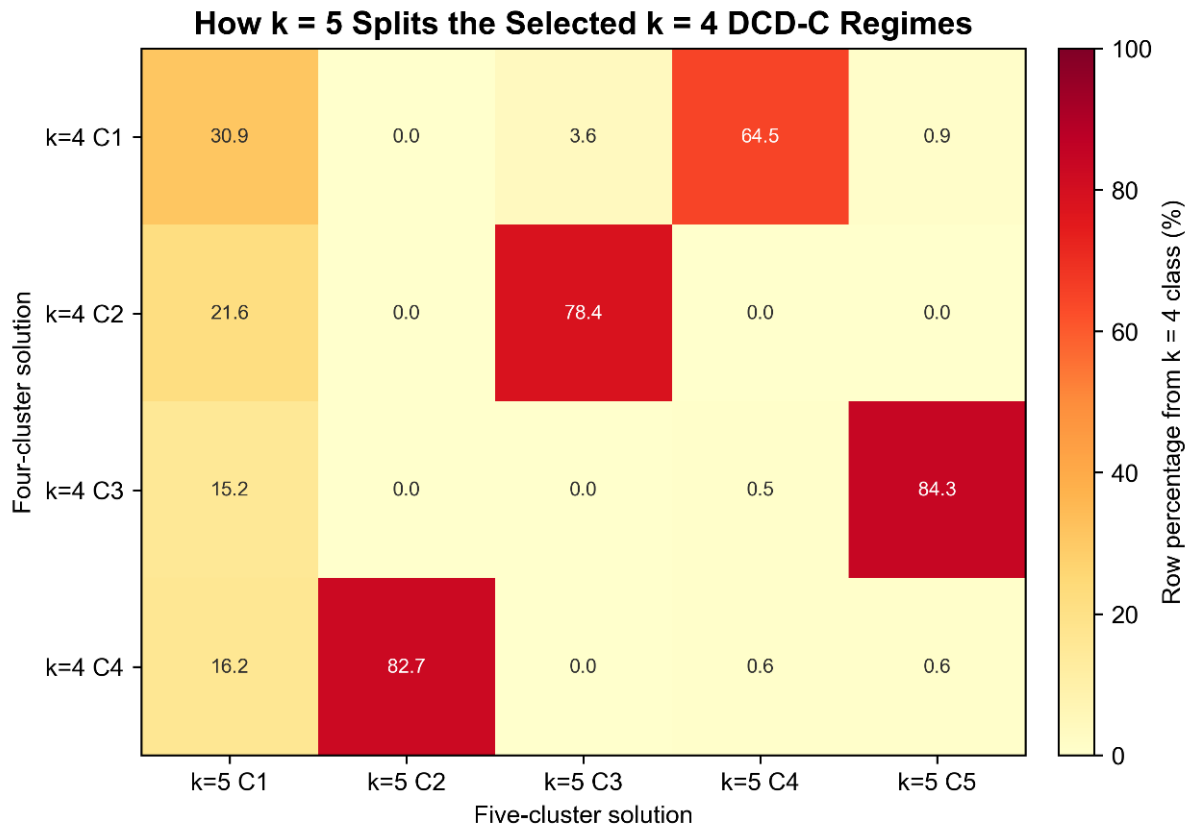

Figure S4. Relationship between the retained k = 4 solution and the alternative k = 5 solution. The heatmap shows how each regime in the four-cluster solution is partitioned into the five-cluster solution. Percentages indicate the fraction of each k = 4 regime assigned to each k = 5 regime. The comparison shows that the additional k = 5 class mainly increases classification granularity by producing mixed or locally split subgroups, rather than forming a clearly independent DCD-C trajectory regime. This supports the use of k = 4 as a parsimonious and physically interpretable regime classification.
